# Supplementary material for: Quantitative Trait Locus Analysis of Microscopic Phenotypic Characteristic Data Obtained Using Optical Coherence Tomography Imaging of Rice Bacterial Leaf Blight Infection in the Field
Source: MDPI journal article supplement (doi:10.3390/agronomy11081630), 2021-08-16
Supplement: s1 [file s1]

## Supporting Information

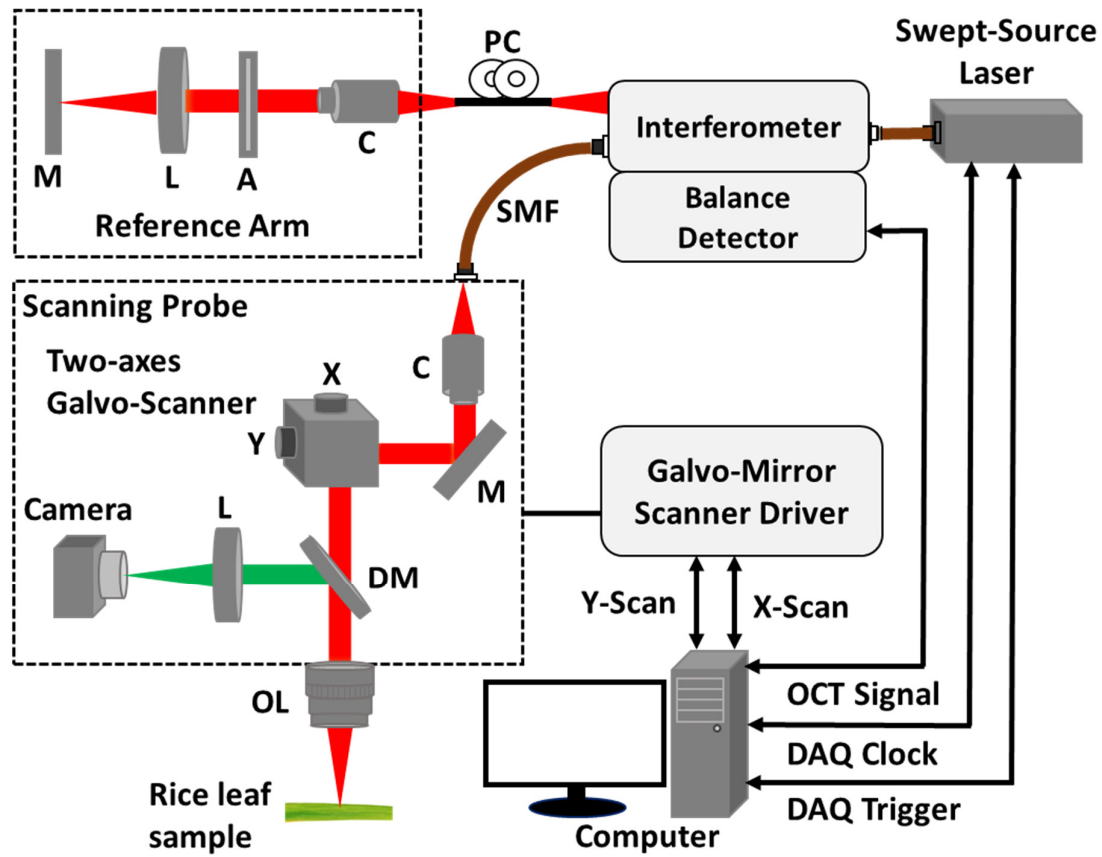

**Figure S1.** Schematic of the SS-OCT system. A: attenuator; C: collimator; DM: dichroic mirror; DAQ, data acquisition board; L: lens; M: mirror; OL: objective lens; PC: polarization controller; SMF: single-mode fiber [23].
